# Supplementary material for: Exploring the functional food potential of Grand naine banana flour (GBF) as a prospective weaning formulation by developing GBF-based composite flour mixes
Source: Royal Society of Chemistry journal article supplement (doi:10.1039/d5fb00335k), 2025-10-06
Supplement: d5fb00335k1.pdf [file d5fb00335k1.pdf]

## Exploring the functional food potential of *Grand naine* banana flour (GBF) as a prospective weaning formulation by developing GBF-based composite flour mixes

### Supplementary files

#### 1. Processing of *grand naine* banana (*Musa* sp.).

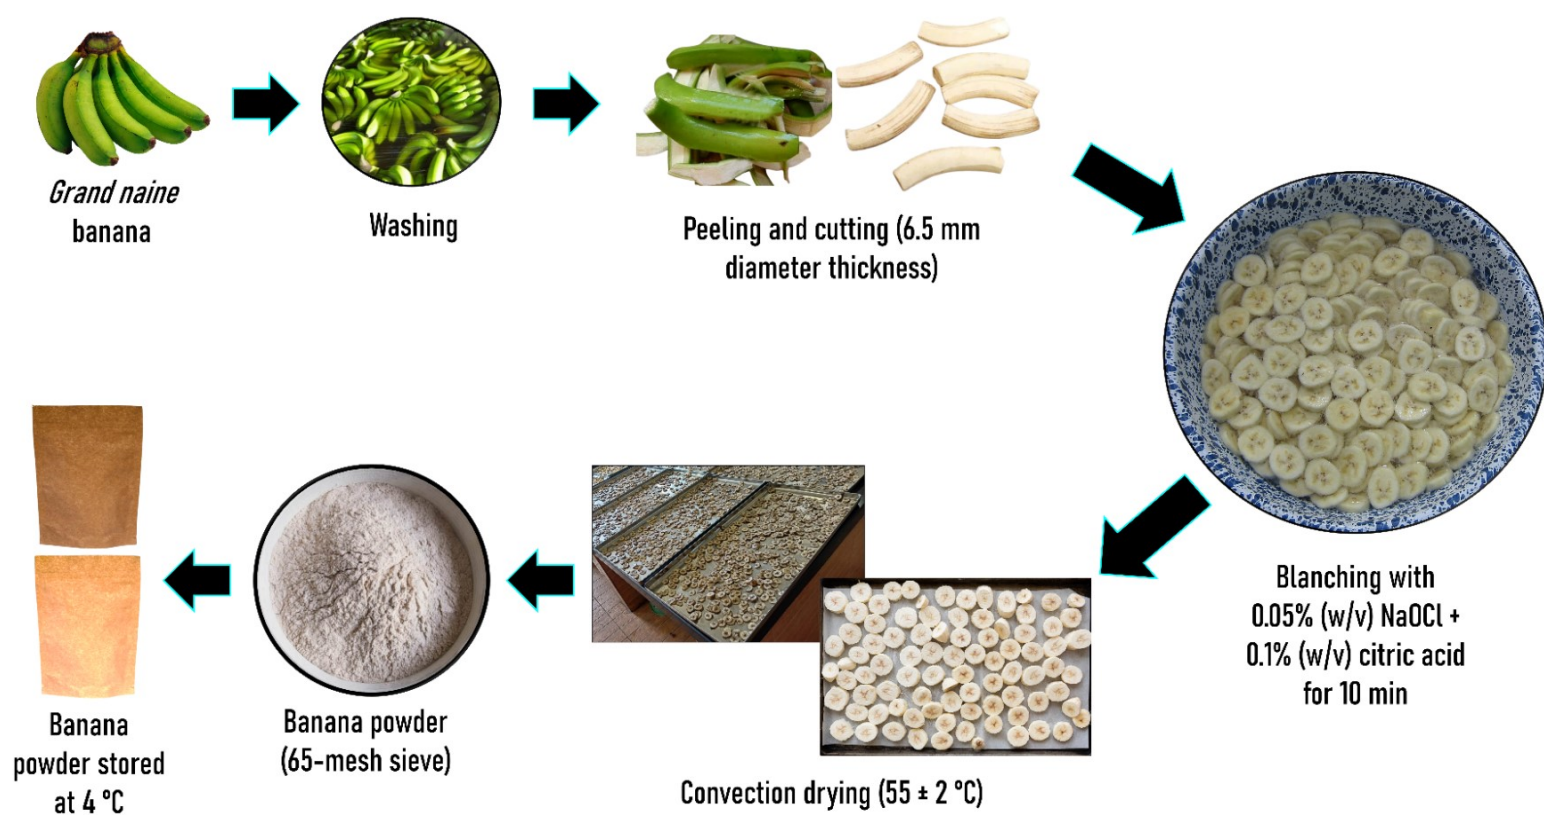

**Supplementary fig. 1.** GBF using hydrothermal treatment (blanching,  $100^\circ\text{C}$  for 10 min), atmospheric forced-air drying (convection tray drying,  $55 \pm 2^\circ\text{C}$ , 8 h), pulverizing, and sieving (65-mesh,  $212\ \mu\text{m}$ ) to obtain the final *grand naine* banana flour (GBF) stored at  $4^\circ\text{C}$  until further analysis.

## 2. DSC thermograms of GBF-based complementary mixes, MIX-1 to MIX-4.

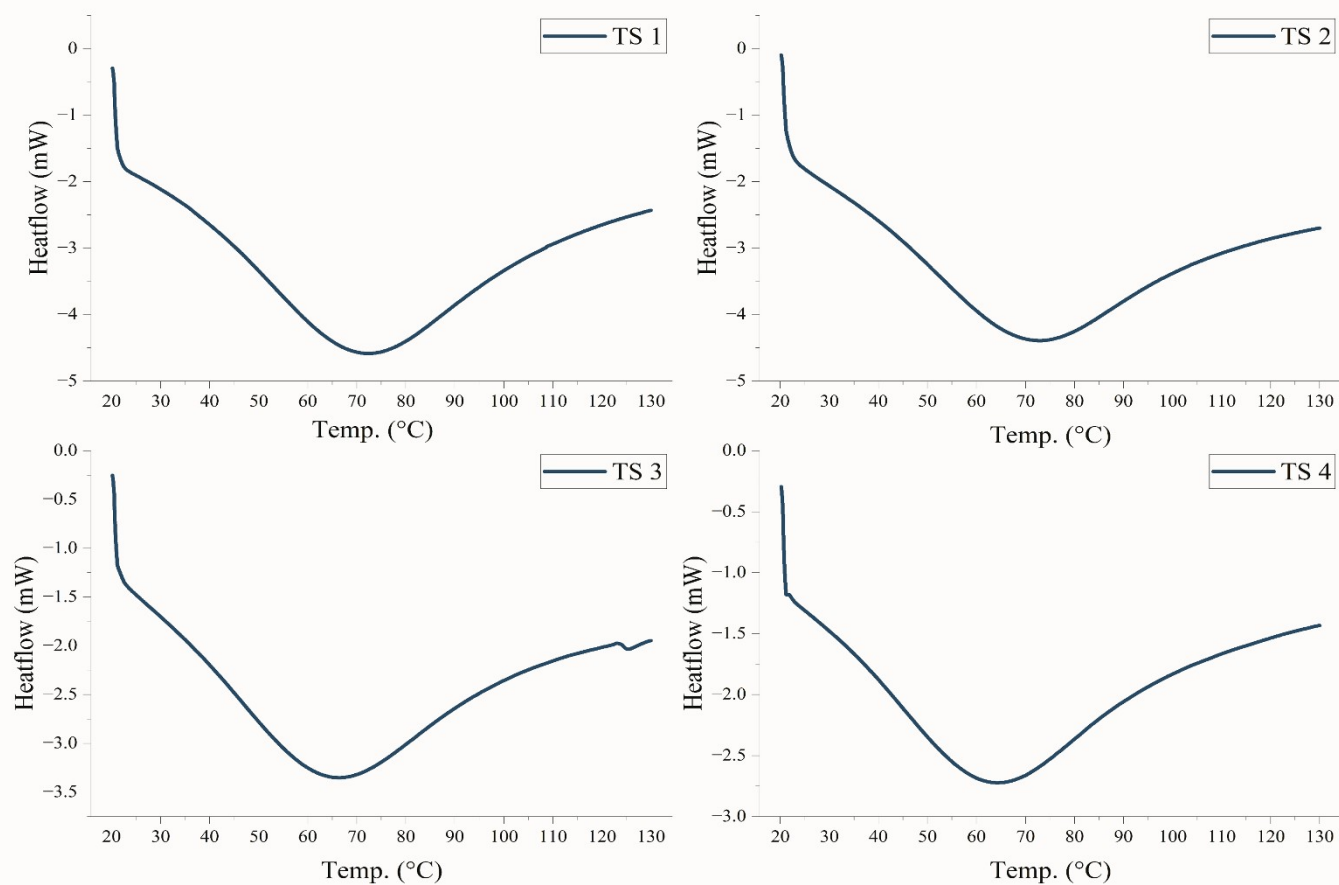

**Supplementary fig. 2.** DSC thermograms (MIX-1 to MIX-4).

### 3. FTIR protein spectra of GBF-based complementary mixes (2<sup>nd</sup> order derivative).

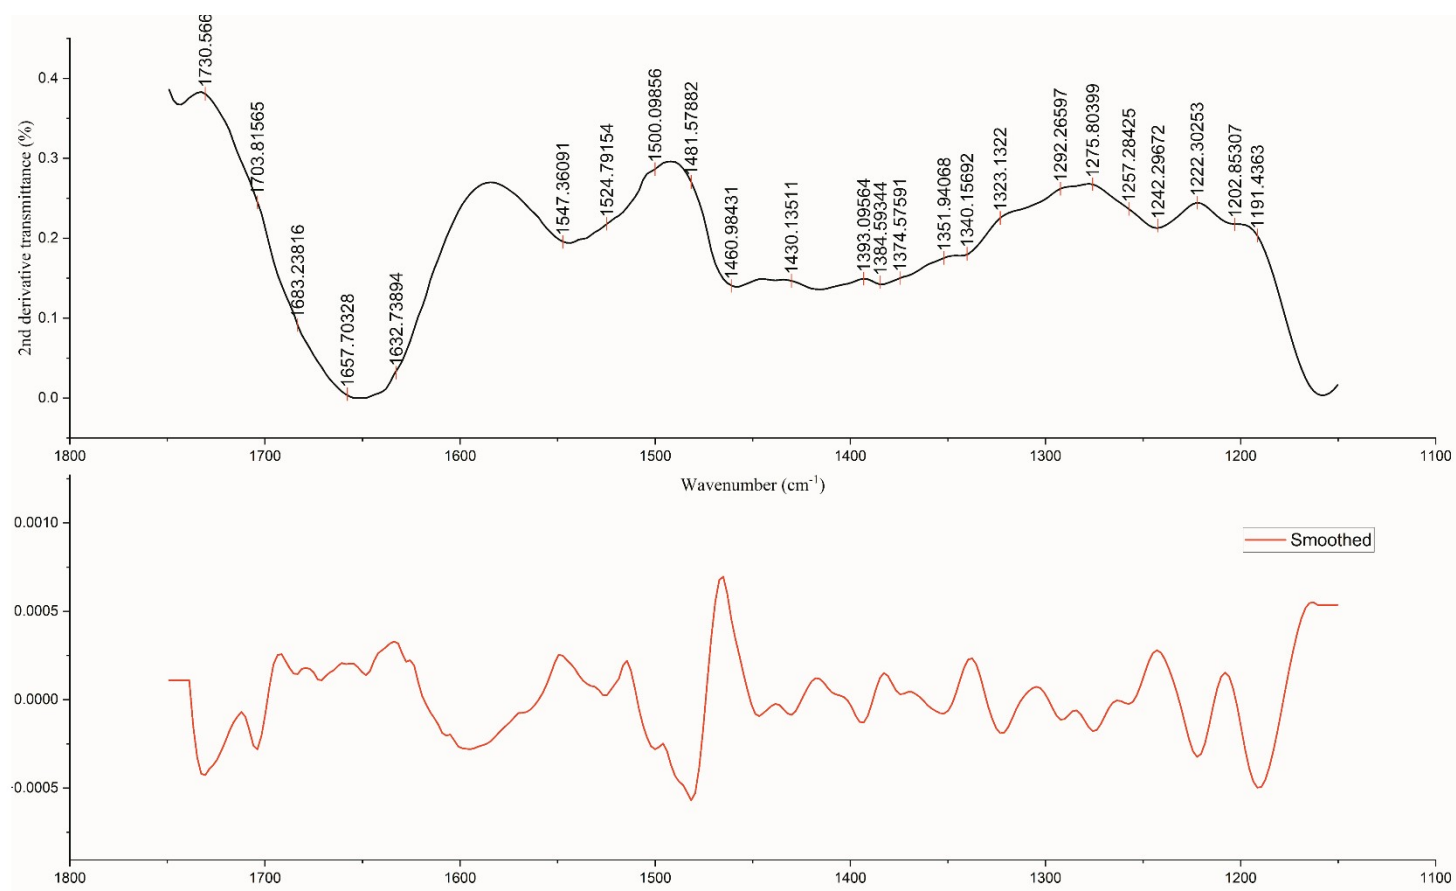

**Supplementary fig. 3A.** MIX-1 associated protein peaks in the amide regions (2<sup>nd</sup> order derivative analysis).

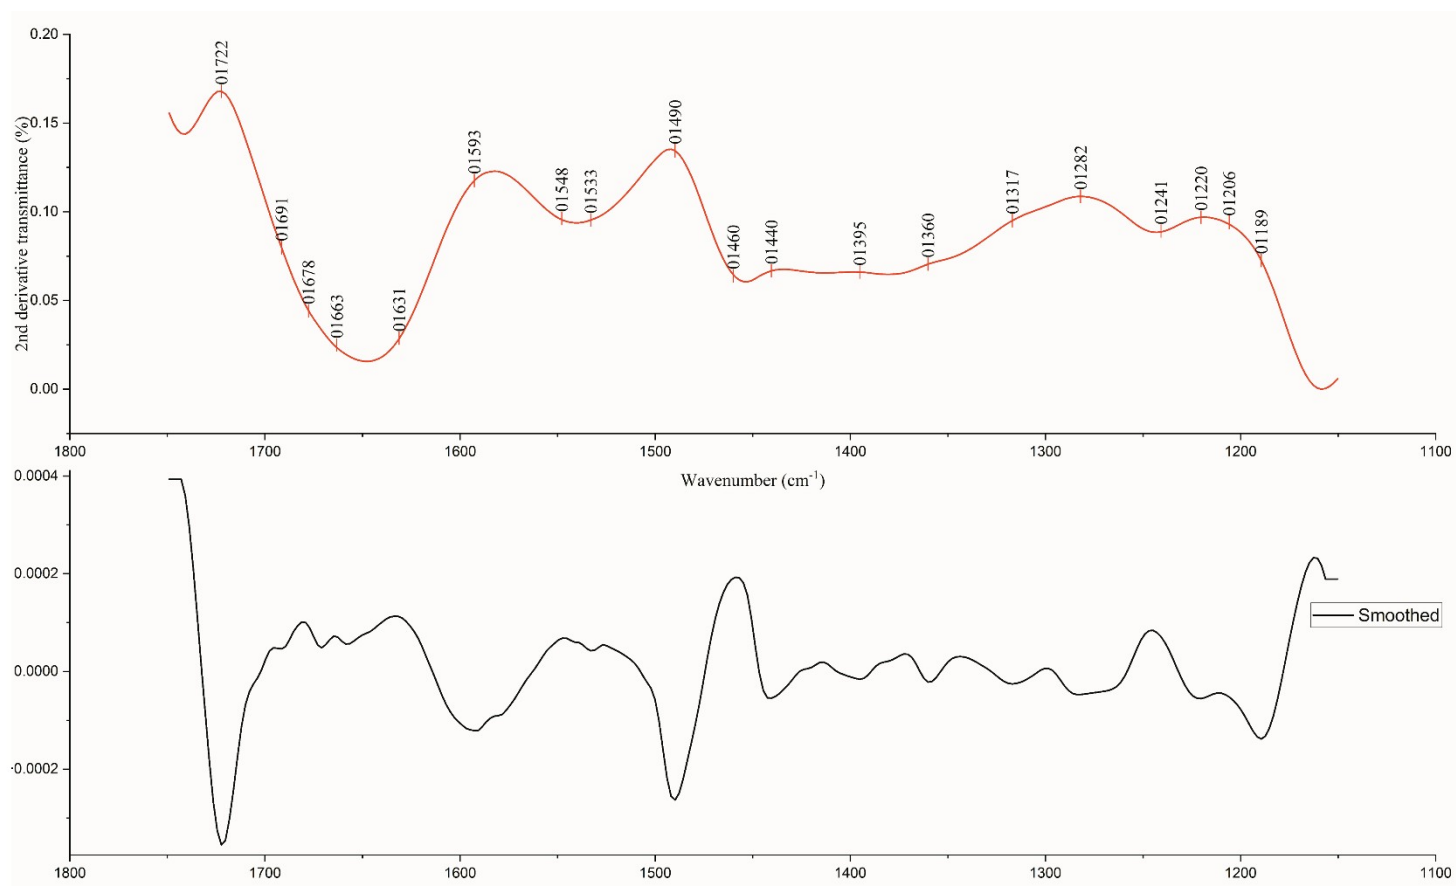

**Supplementary fig. 3B.** MIX-2 associated protein peaks in the amide regions (2<sup>nd</sup> order derivative analysis).

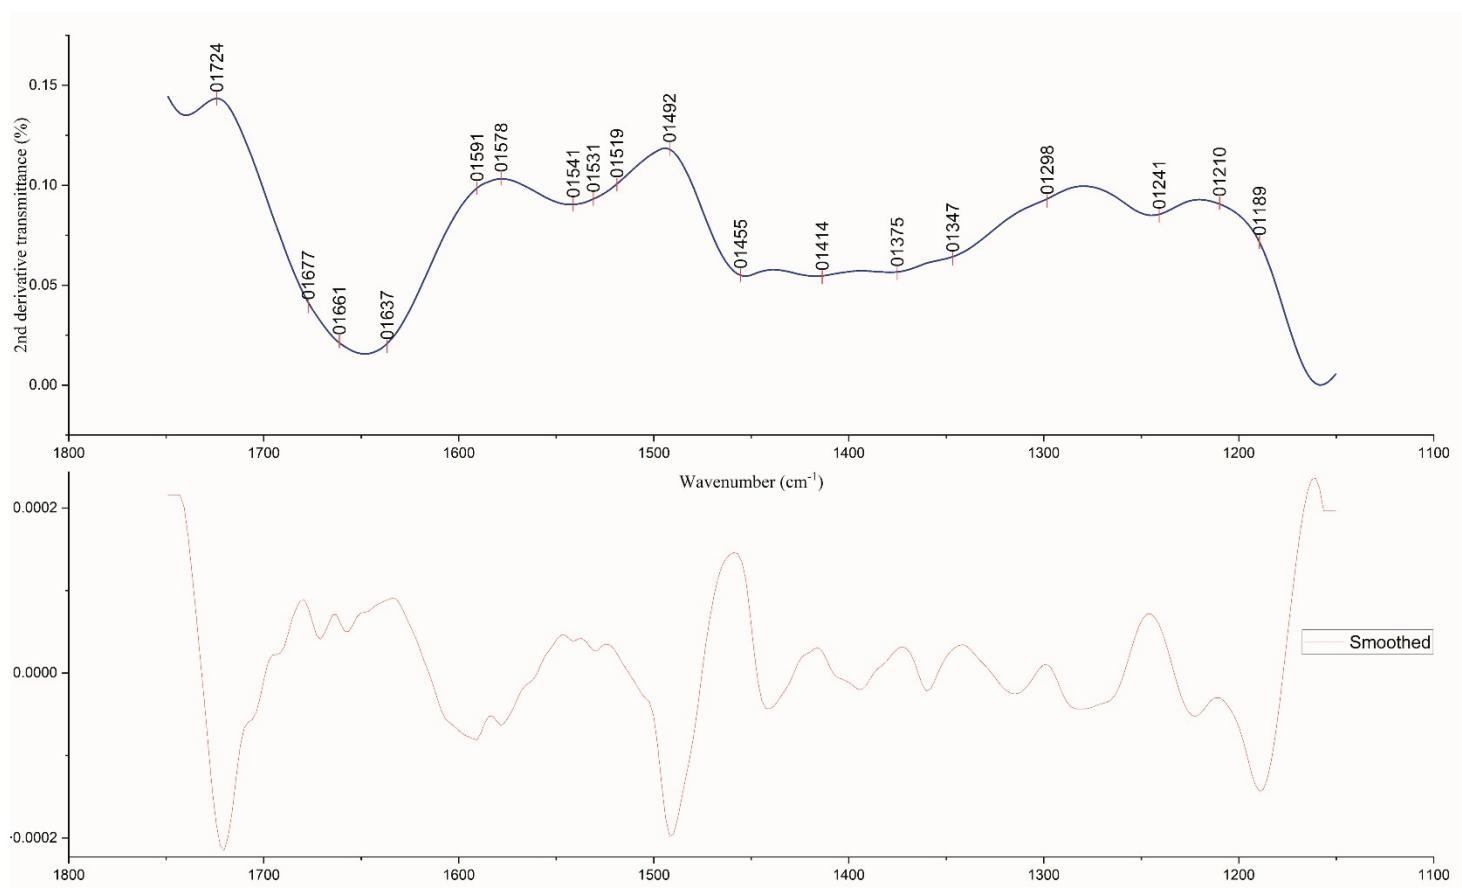

**Supplementary fig. 3C.** MIX-3 associated protein peaks in the amide regions (2<sup>nd</sup> order derivative analysis).

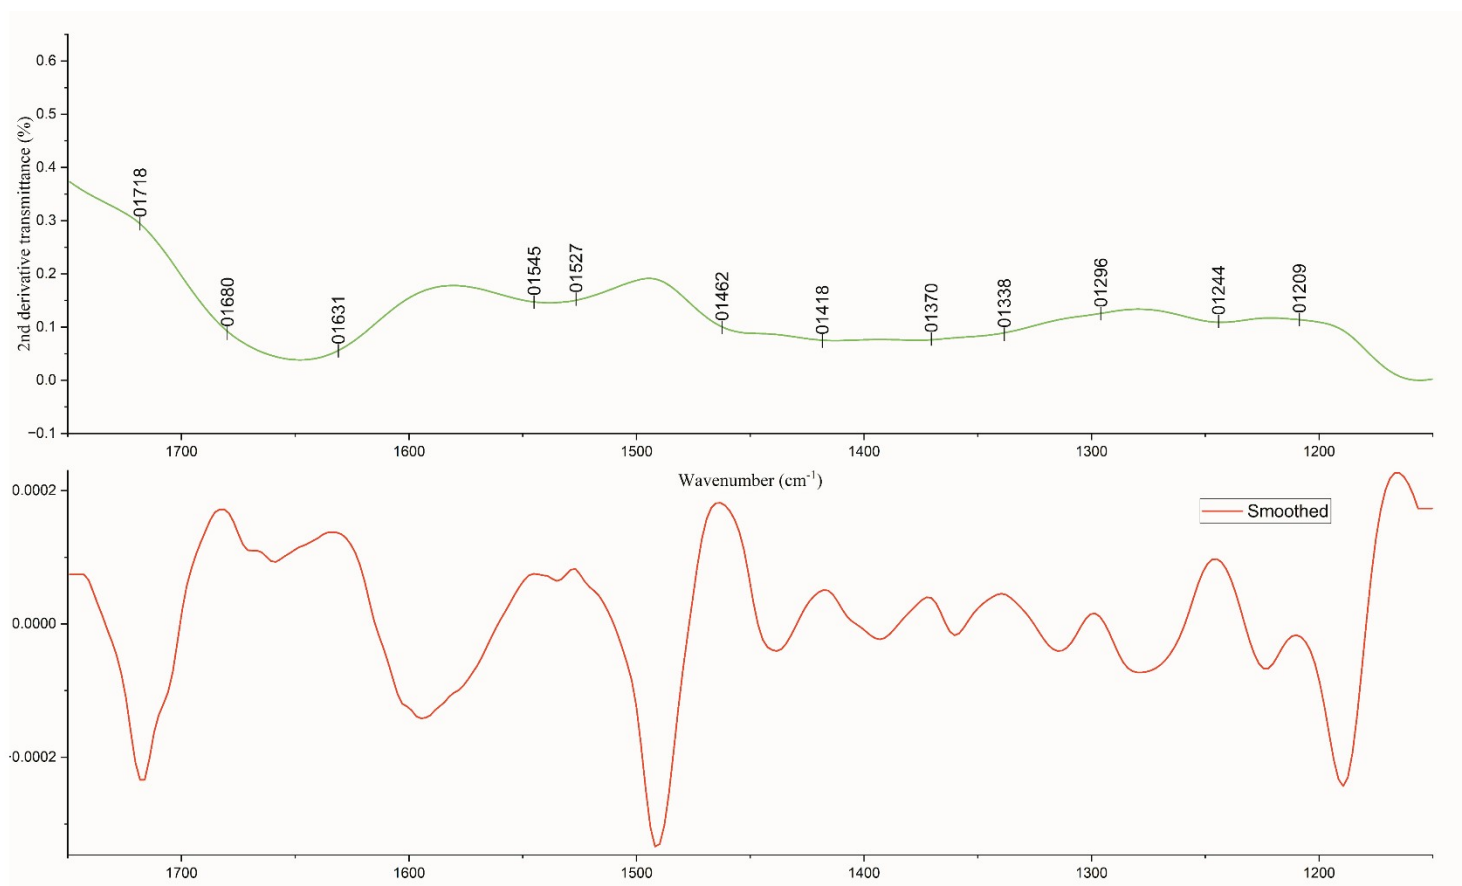

**Supplementary fig. 3D.** MIX-4 associated protein peaks in the amide regions (2<sup>nd</sup> order derivative analysis).

4. Additional SEM images of GBF-based complementary mixes (scale = 10  $\mu\text{m}$ ).

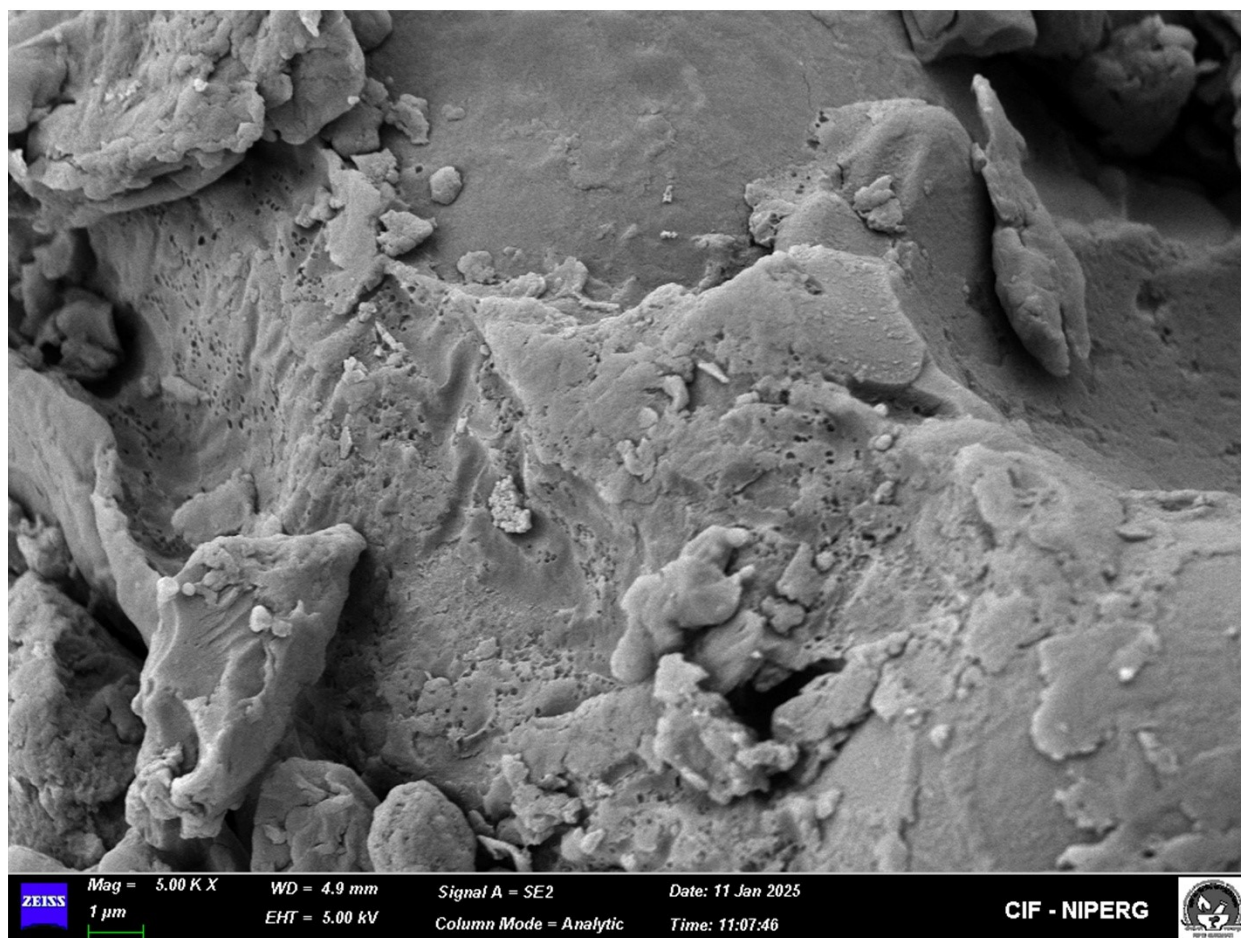

**Supplementary fig. 4A.** Complementary mix (MIX-1) (scale = 10  $\mu\text{m}$ ).



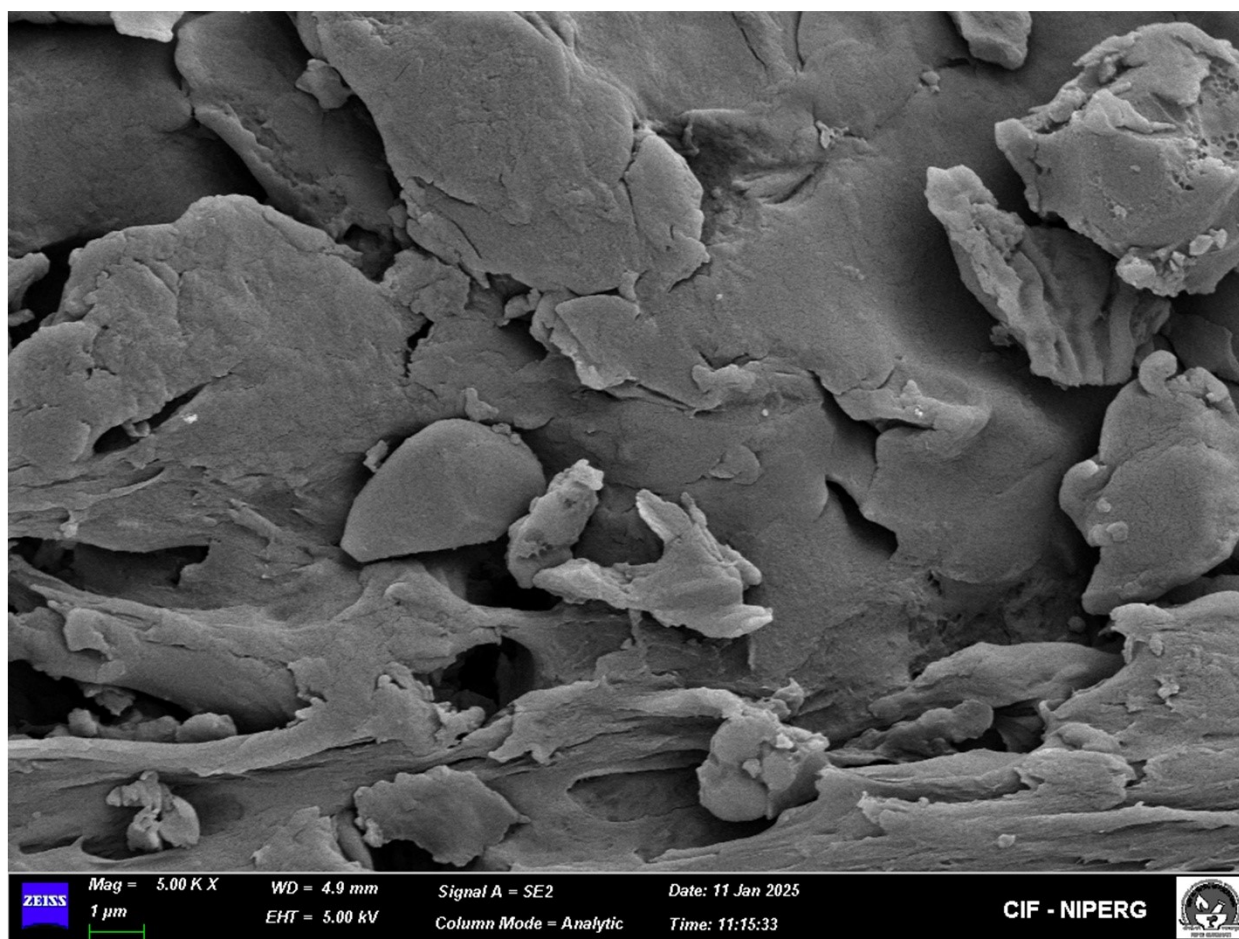

**Supplementary fig. 4B.** Complementary mix (MIX-2) (scale = 10  $\mu\text{m}$ ).



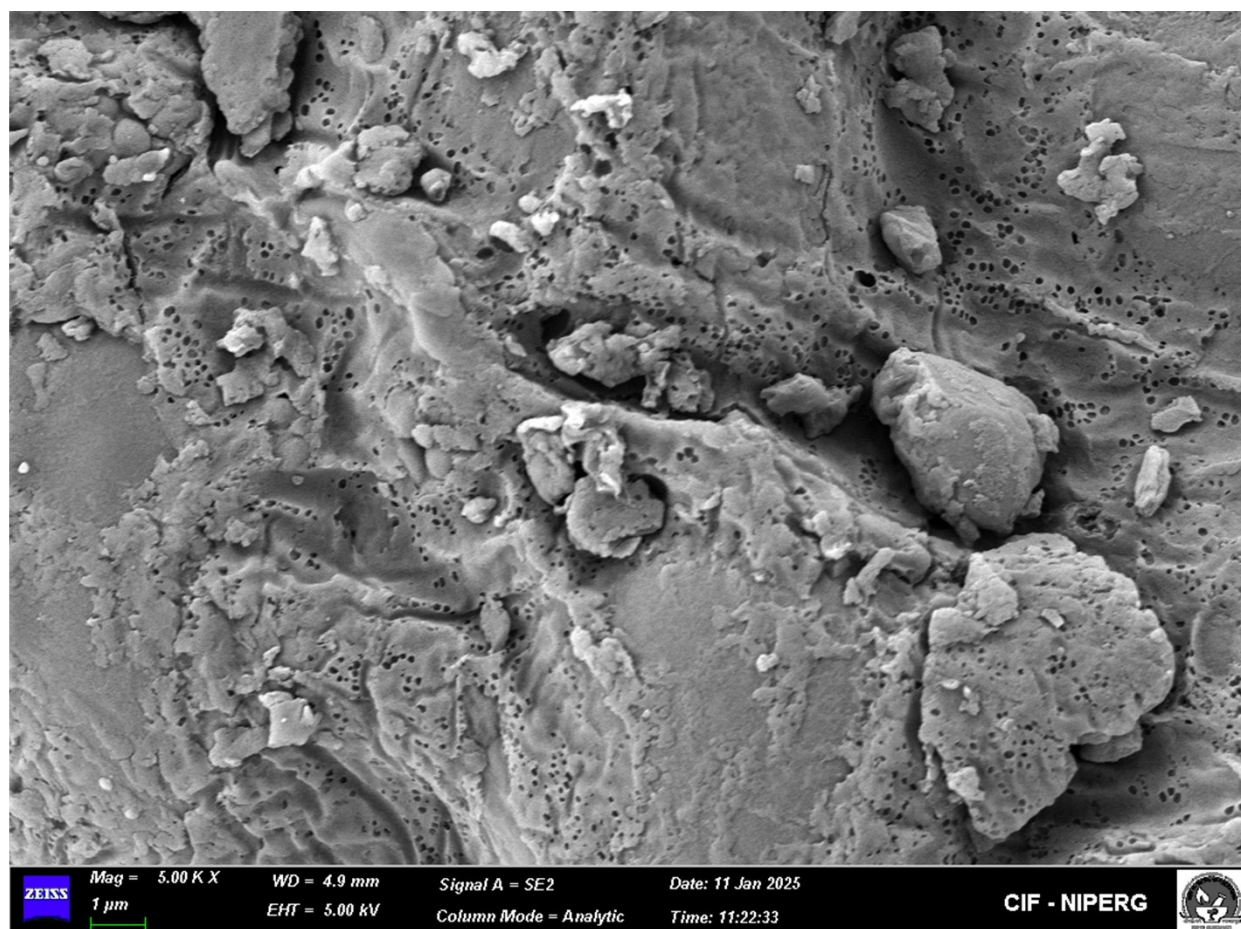

**Supplementary fig. 4C.** Complementary mix (MIX-3) (scale = 10  $\mu$ m).

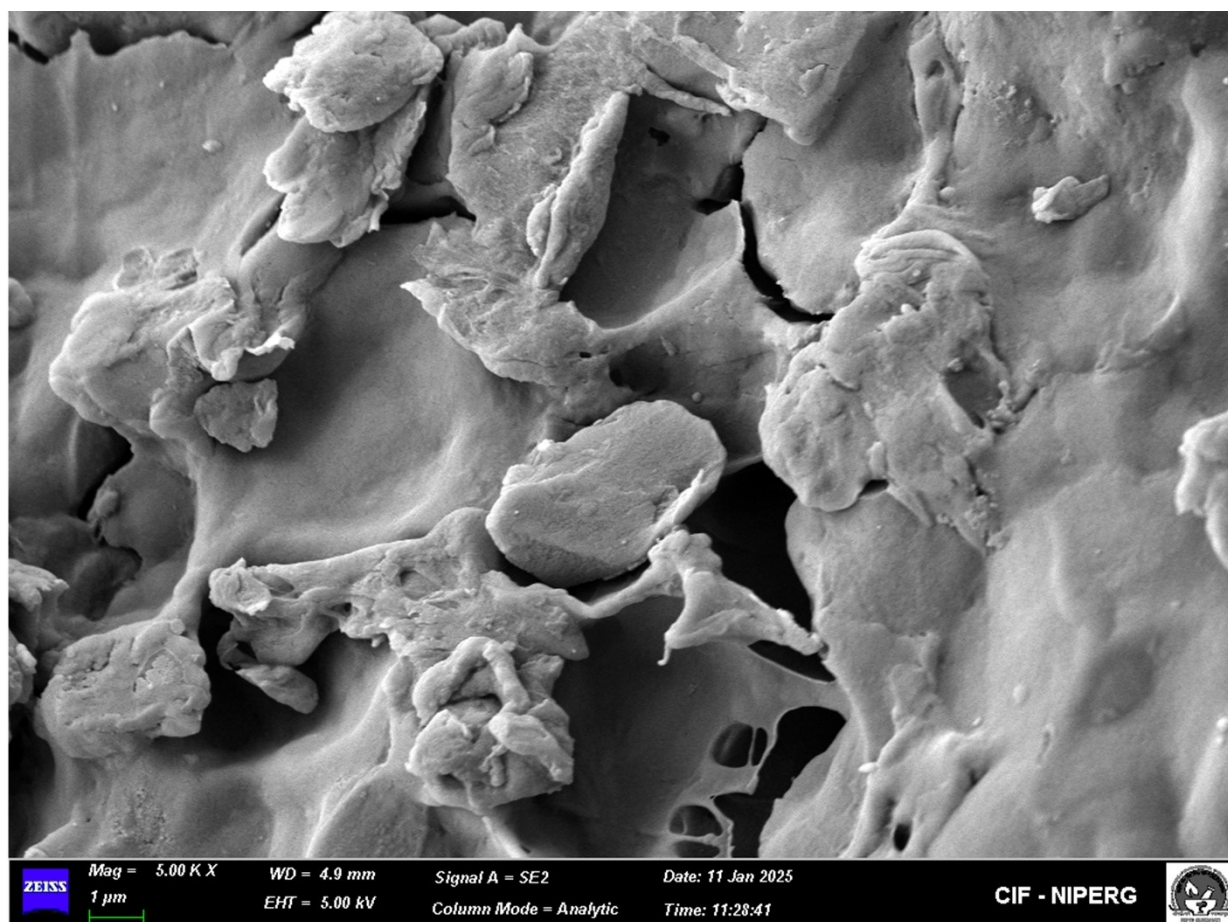

**Supplementary fig. 4D.** Complementary mix (MIX-4) (scale = 10 μm).

## 5. Sensory assessment (spider chart)

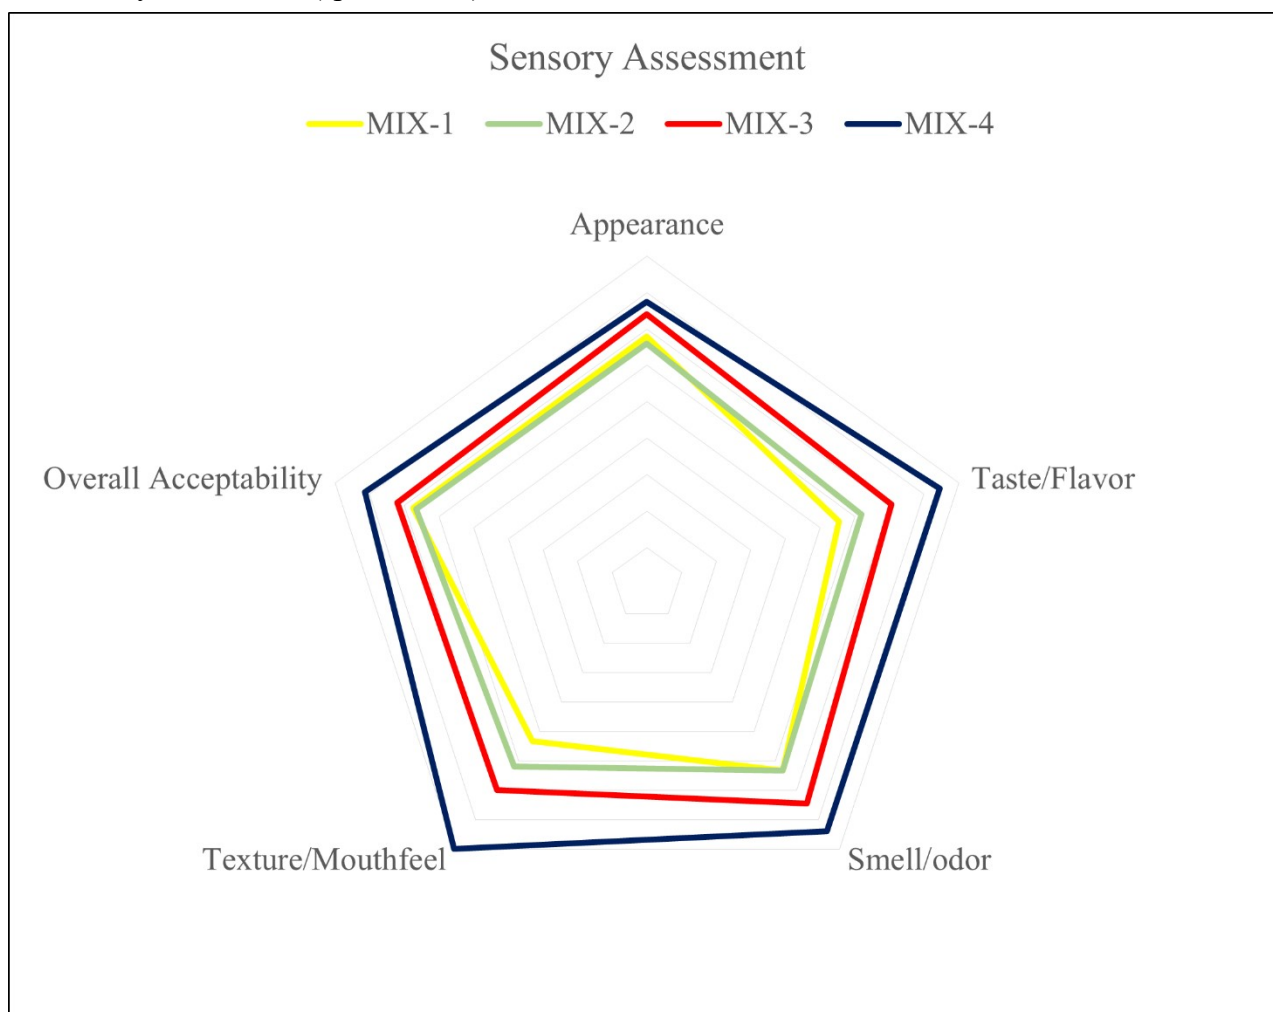

**Supplementary fig. 5.** Sensory assessment of complementary formulations.
